# Supplementary material for: A dual EMT-ferroptosis gene signature predicts survival and immune infiltration in esophageal squamous cell carcinoma
Source: Research Square preprint supplement (doi:10.21203/rs.3.rs-6456491/v1), 2025-05-09
Supplement: Supplementary file 1 [file 9170e8830a80fce6de70eaa3.docx]

Supplementary Table 1. Chi-square test of the immune infiltration abundance in different risk groups in GEO cohort.

| Risk group | Immune infiltration abundance | | Total counts | P value |
| --- | --- | --- | --- | --- |
| High | Low |
| High-FEIS | 23 | 66 | 89 | 0.023 |
| Low-FEIS | 11 | 79 | 90 |
